# Supplementary material for: Incorporating anthropogenic thresholds to improve understanding of cumulative effects on seagrass beds
Source: Atypon-hosted journal article supplement (doi:10.1139/facets-2021-0130), 2022-01-01
Supplement: facets-2021-0130_supplement2.csv [file facets-2021-0130_supplement2.csv]

bay	meadow.ID	CE.score	CE.threshold.score	CE.score.above.threshold	max.possible.score	region_1	region_2	province	latitude	longitude	urban.cover.raw	urban.cover.threshold	urban.cover.above.threshold	urban.cover.IS	agri.cover.raw	agri.cover.threshold	agri.cover.above.threshold	agri.cover.IS	n.loading.raw	n.loading.threshold	n.loading.above.threshold	n.loading.IS	invasion.extent.raw	invasion.extent.threshold	invasion.extent.above.threshold	invasion.extent.IS	shellfish.aquaculture.raw	shellfish.aquaculture.threshold	shellfish.aquaculture.above.threshold	shellfish.aquaculture.IS	hardened.shoreline.raw	hardened.shoreline.threshold	hardened.shoreline.above.threshold	hardened.shoreline.IS	NumberImpactsAboveThreshold
baie.verte	baie.verte.A	0.86	3.17	N	11.65	gulf	Gulf NS + NB	NB	46.05	-64.05	2.23	21.50	0.00	0.13	5.70	19.00	0.00	0.16	29.58	100.00	0.00	0.09	1.00	1.00	1.00	0.47	0.00	20.00	0.00	0.00	0.00	5.40	0.00	0.00	1.00
baie.verte	baie.verte.C	0.99	3.17	N	11.65	gulf	Gulf NS + NB	NB	46.05	-64.08	2.23	21.50	0.00	0.13	5.70	19.00	0.00	0.16	29.58	100.00	0.00	0.09	1.00	1.00	1.00	0.47	0.00	20.00	0.00	0.00	3.09	5.40	0.00	0.13	1.00
baie.verte	baie.verte.B	0.86	3.17	N	11.65	gulf	Gulf NS + NB	NB	46.05	-64.06	2.23	21.50	0.00	0.13	5.70	19.00	0.00	0.16	29.58	100.00	0.00	0.09	1.00	1.00	1.00	0.47	0.00	20.00	0.00	0.00	0.00	5.40	0.00	0.00	1.00
basin.head	basin.head.A	5.90	3.26	Y	12.25	gulf	PEI	PEI	46.38	-62.11	10.18	21.50	0.00	0.59	41.48	19.00	1.00	1.20	470.86	100.00	1.00	1.90	4.00	1.00	1.00	1.89	0.00	20.00	0.00	0.00	7.91	5.40	1.00	0.32	4.00
basin.head	basin.head.B	5.88	3.26	Y	12.25	gulf	PEI	PEI	46.38	-62.11	10.18	21.50	0.00	0.59	41.48	19.00	1.00	1.20	470.86	100.00	1.00	1.90	4.00	1.00	1.00	1.89	0.00	20.00	0.00	0.00	7.45	5.40	1.00	0.30	4.00
basin.head	basin.head.C	5.77	3.26	Y	12.25	gulf	PEI	PEI	46.39	-62.12	10.18	21.50	0.00	0.59	41.48	19.00	1.00	1.20	470.86	100.00	1.00	1.90	4.00	1.00	1.00	1.89	0.00	20.00	0.00	0.00	4.77	5.40	0.00	0.19	3.00
bedeque	bedeque.E	5.63	3.26	Y	12.25	gulf	PEI	PEI	46.38	-63.79	8.19	21.50	0.00	0.48	68.82	19.00	1.00	1.99	550.58	100.00	1.00	2.22	2.00	1.00	1.00	0.95	0.00	20.00	0.00	0.00	0.00	5.40	0.00	0.00	3.00
bedeque	bedeque.A	6.43	3.26	Y	12.25	gulf	PEI	PEI	46.39	-63.77	8.19	21.50	0.00	0.48	68.82	19.00	1.00	1.99	550.58	100.00	1.00	2.22	2.00	1.00	1.00	0.95	0.00	20.00	0.00	0.00	19.68	5.40	1.00	0.80	4.00
bedeque	bedeque.B	5.63	3.26	Y	12.25	gulf	PEI	PEI	46.35	-63.78	8.19	21.50	0.00	0.48	68.82	19.00	1.00	1.99	550.58	100.00	1.00	2.22	2.00	1.00	1.00	0.95	0.00	20.00	0.00	0.00	0.00	5.40	0.00	0.00	3.00
bedeque	bedeque.C	5.63	3.26	Y	12.25	gulf	PEI	PEI	46.35	-63.76	8.19	21.50	0.00	0.48	68.82	19.00	1.00	1.99	550.58	100.00	1.00	2.22	2.00	1.00	1.00	0.95	0.00	20.00	0.00	0.00	0.00	5.40	0.00	0.00	3.00
bedeque	bedeque.D	5.63	3.26	Y	12.25	gulf	PEI	PEI	46.36	-63.76	8.19	21.50	0.00	0.48	68.82	19.00	1.00	1.99	550.58	100.00	1.00	2.22	2.00	1.00	1.00	0.95	0.00	20.00	0.00	0.00	0.00	5.40	0.00	0.00	3.00
bouctouche	bouctouche.D	0.91	3.17	N	11.65	gulf	Gulf NS + NB	NB	46.46	-64.73	6.18	21.50	0.00	0.36	10.37	19.00	0.00	0.30	49.39	100.00	0.00	0.16	0.00	1.00	0.00	0.00	0.00	20.00	0.00	0.00	2.29	5.40	0.00	0.09	0.00
bouctouche	bouctouche.C	1.49	3.17	N	11.65	gulf	Gulf NS + NB	NB	46.47	-64.71	6.18	21.50	0.00	0.36	10.37	19.00	0.00	0.30	49.39	100.00	0.00	0.16	0.00	1.00	0.00	0.00	0.00	20.00	0.00	0.00	16.59	5.40	1.00	0.67	1.00
bouctouche	bouctouche.B	2.22	3.17	N	11.65	gulf	Gulf NS + NB	NB	46.48	-64.69	6.18	21.50	0.00	0.36	10.37	19.00	0.00	0.30	49.39	100.00	0.00	0.16	0.00	1.00	0.00	0.00	0.00	20.00	0.00	0.00	34.66	5.40	1.00	1.40	1.00
bouctouche	bouctouche.A	4.37	3.17	Y	11.65	gulf	Gulf NS + NB	NB	46.50	-64.68	6.18	21.50	0.00	0.36	10.37	19.00	0.00	0.30	49.39	100.00	0.00	0.16	0.00	1.00	0.00	0.00	88.21	20.00	1.00	1.60	48.15	5.40	1.00	1.95	2.00
brudenell	brudenell.B	4.87	3.26	Y	12.25	gulf	PEI	PEI	46.19	-62.59	14.55	21.50	0.00	0.84	41.76	19.00	1.00	1.21	347.38	100.00	1.00	1.40	3.00	1.00	1.00	1.42	0.00	20.00	0.00	0.00	0.00	5.40	0.00	0.00	3.00
brudenell	brudenell.A	4.87	3.26	Y	12.25	gulf	PEI	PEI	46.20	-62.60	14.55	21.50	0.00	0.84	41.76	19.00	1.00	1.21	347.38	100.00	1.00	1.40	3.00	1.00	1.00	1.42	0.00	20.00	0.00	0.00	0.00	5.40	0.00	0.00	3.00
brudenell	brudenell.D	5.30	3.26	Y	12.25	gulf	PEI	PEI	46.18	-62.55	14.55	21.50	0.00	0.84	41.76	19.00	1.00	1.21	347.38	100.00	1.00	1.40	3.00	1.00	1.00	1.42	0.00	20.00	0.00	0.00	10.71	5.40	1.00	0.43	4.00
brudenell	brudenell.C	4.88	3.26	Y	12.25	gulf	PEI	PEI	46.20	-62.58	14.55	21.50	0.00	0.84	41.76	19.00	1.00	1.21	347.38	100.00	1.00	1.40	3.00	1.00	1.00	1.42	0.00	20.00	0.00	0.00	0.14	5.40	0.00	0.01	3.00
cable.island	cable.island.A	0.23	3.17	N	11.65	atlantic	Scotian Shelf	NS	44.75	-62.80	1.73	21.50	0.00	0.10	0.01	19.00	0.00	0.00	39.56	100.00	0.00	0.13	0.00	1.00	0.00	0.00	0.00	20.00	0.00	0.00	0.00	5.40	0.00	0.00	0.00
cable.island	cable.island.B	0.23	3.17	N	11.65	atlantic	Scotian Shelf	NS	44.75	-62.79	1.73	21.50	0.00	0.10	0.01	19.00	0.00	0.00	39.56	100.00	0.00	0.13	0.00	1.00	0.00	0.00	0.00	20.00	0.00	0.00	0.00	5.40	0.00	0.00	0.00
cap.pele	cap.pele	2.99	3.17	N	11.65	gulf	Gulf NS + NB	NB	46.22	-64.40	8.05	21.50	0.00	0.47	27.40	19.00	1.00	0.79	284.72	100.00	1.00	0.91	1.00	1.00	1.00	0.47	0.00	20.00	0.00	0.00	8.63	5.40	1.00	0.35	4.00
cardigan	cardigan.K	3.04	3.26	N	12.25	gulf	PEI	PEI	46.23	-62.61	6.83	21.50	0.00	0.40	21.24	19.00	1.00	0.61	104.12	100.00	1.00	0.42	3.00	1.00	1.00	1.42	0.00	20.00	0.00	0.00	4.85	5.40	0.00	0.20	3.00
cardigan	cardigan.B	2.89	3.26	N	12.25	gulf	PEI	PEI	46.22	-62.52	6.83	21.50	0.00	0.40	21.24	19.00	1.00	0.61	104.12	100.00	1.00	0.42	3.00	1.00	1.00	1.42	0.00	20.00	0.00	0.00	1.04	5.40	0.00	0.04	3.00
cardigan	cardigan.D	2.94	3.26	N	12.25	gulf	PEI	PEI	46.22	-62.53	6.83	21.50	0.00	0.40	21.24	19.00	1.00	0.61	104.12	100.00	1.00	0.42	3.00	1.00	1.00	1.42	0.00	20.00	0.00	0.00	2.32	5.40	0.00	0.09	3.00
cardigan	cardigan.E	2.88	3.26	N	12.25	gulf	PEI	PEI	46.23	-62.55	6.83	21.50	0.00	0.40	21.24	19.00	1.00	0.61	104.12	100.00	1.00	0.42	3.00	1.00	1.00	1.42	0.00	20.00	0.00	0.00	0.81	5.40	0.00	0.03	3.00
cardigan	cardigan.F	2.85	3.26	N	12.25	gulf	PEI	PEI	46.22	-62.57	6.83	21.50	0.00	0.40	21.24	19.00	1.00	0.61	104.12	100.00	1.00	0.42	3.00	1.00	1.00	1.42	0.00	20.00	0.00	0.00	0.00	5.40	0.00	0.00	3.00
cardigan	cardigan.C	3.14	3.26	N	12.25	gulf	PEI	PEI	46.21	-62.53	6.83	21.50	0.00	0.40	21.24	19.00	1.00	0.61	104.12	100.00	1.00	0.42	3.00	1.00	1.00	1.42	0.00	20.00	0.00	0.00	7.16	5.40	1.00	0.29	4.00
cardigan	cardigan.G	2.85	3.26	N	12.25	gulf	PEI	PEI	46.22	-62.58	6.83	21.50	0.00	0.40	21.24	19.00	1.00	0.61	104.12	100.00	1.00	0.42	3.00	1.00	1.00	1.42	0.00	20.00	0.00	0.00	0.00	5.40	0.00	0.00	3.00
cardigan	cardigan.H	2.85	3.26	N	12.25	gulf	PEI	PEI	46.23	-62.60	6.83	21.50	0.00	0.40	21.24	19.00	1.00	0.61	104.12	100.00	1.00	0.42	3.00	1.00	1.00	1.42	0.00	20.00	0.00	0.00	0.00	5.40	0.00	0.00	3.00
cardigan	cardigan.A	3.11	3.26	N	12.25	gulf	PEI	PEI	46.20	-62.52	6.83	21.50	0.00	0.40	21.24	19.00	1.00	0.61	104.12	100.00	1.00	0.42	3.00	1.00	1.00	1.42	0.00	20.00	0.00	0.00	6.53	5.40	1.00	0.26	4.00
cardigan	cardigan.I	2.88	3.26	N	12.25	gulf	PEI	PEI	46.23	-62.60	6.83	21.50	0.00	0.40	21.24	19.00	1.00	0.61	104.12	100.00	1.00	0.42	3.00	1.00	1.00	1.42	0.00	20.00	0.00	0.00	0.80	5.40	0.00	0.03	3.00
cardigan	cardigan.J	3.04	3.26	N	12.25	gulf	PEI	PEI	46.23	-62.61	6.83	21.50	0.00	0.40	21.24	19.00	1.00	0.61	104.12	100.00	1.00	0.42	3.00	1.00	1.00	1.42	0.00	20.00	0.00	0.00	4.71	5.40	0.00	0.19	3.00
caribou	caribou.D	1.38	3.17	N	11.65	gulf	Gulf NS + NB	NS	45.75	-62.74	3.46	21.50	0.00	0.20	12.10	19.00	0.00	0.35	40.04	100.00	0.00	0.13	1.00	1.00	1.00	0.47	0.00	20.00	0.00	0.00	5.67	5.40	1.00	0.23	2.00
caribou	caribou.F	1.27	3.17	N	11.65	gulf	Gulf NS + NB	NS	45.74	-62.74	3.46	21.50	0.00	0.20	12.10	19.00	0.00	0.35	40.04	100.00	0.00	0.13	1.00	1.00	1.00	0.47	0.00	20.00	0.00	0.00	2.95	5.40	0.00	0.12	1.00
caribou	caribou.B	1.47	3.17	N	11.65	gulf	Gulf NS + NB	NS	45.76	-62.70	3.46	21.50	0.00	0.20	12.10	19.00	0.00	0.35	40.04	100.00	0.00	0.13	1.00	1.00	1.00	0.47	0.00	20.00	0.00	0.00	7.80	5.40	1.00	0.32	2.00
caribou	caribou.C	1.37	3.17	N	11.65	gulf	Gulf NS + NB	NS	45.75	-62.71	3.46	21.50	0.00	0.20	12.10	19.00	0.00	0.35	40.04	100.00	0.00	0.13	1.00	1.00	1.00	0.47	0.00	20.00	0.00	0.00	5.41	5.40	1.00	0.22	2.00
caribou	caribou.A	1.70	3.17	N	11.65	gulf	Gulf NS + NB	NS	45.76	-62.69	3.46	21.50	0.00	0.20	12.10	19.00	0.00	0.35	40.04	100.00	0.00	0.13	1.00	1.00	1.00	0.47	0.00	20.00	0.00	0.00	13.46	5.40	1.00	0.55	2.00
caribou	caribou.H	1.15	3.17	N	11.65	gulf	Gulf NS + NB	NS	45.74	-62.70	3.46	21.50	0.00	0.20	12.10	19.00	0.00	0.35	40.04	100.00	0.00	0.13	1.00	1.00	1.00	0.47	0.00	20.00	0.00	0.00	0.00	5.40	0.00	0.00	1.00
caribou	caribou.E	1.46	3.17	N	11.65	gulf	Gulf NS + NB	NS	45.76	-62.77	3.46	21.50	0.00	0.20	12.10	19.00	0.00	0.35	40.04	100.00	0.00	0.13	1.00	1.00	1.00	0.47	0.00	20.00	0.00	0.00	7.50	5.40	1.00	0.30	2.00
caribou	caribou.I	1.26	3.17	N	11.65	gulf	Gulf NS + NB	NS	45.74	-62.67	3.46	21.50	0.00	0.20	12.10	19.00	0.00	0.35	40.04	100.00	0.00	0.13	1.00	1.00	1.00	0.47	0.00	20.00	0.00	0.00	2.72	5.40	0.00	0.11	1.00
caribou	caribou.G	1.15	3.17	N	11.65	gulf	Gulf NS + NB	NS	45.74	-62.72	3.46	21.50	0.00	0.20	12.10	19.00	0.00	0.35	40.04	100.00	0.00	0.13	1.00	1.00	1.00	0.47	0.00	20.00	0.00	0.00	0.00	5.40	0.00	0.00	1.00
charlottetown	charlottetown.A	4.57	3.26	Y	12.25	gulf	PEI	PEI	46.22	-63.12	11.31	21.50	0.00	0.66	38.05	19.00	1.00	1.10	72.12	100.00	0.00	0.29	2.00	1.00	1.00	0.95	0.00	20.00	0.00	0.00	38.89	5.40	1.00	1.58	3.00
charlottetown	charlottetown.B	3.98	3.26	Y	12.25	gulf	PEI	PEI	46.22	-63.16	11.31	21.50	0.00	0.66	38.05	19.00	1.00	1.10	72.12	100.00	0.00	0.29	2.00	1.00	1.00	0.95	0.00	20.00	0.00	0.00	24.35	5.40	1.00	0.99	3.00
charlottetown	charlottetown.C	3.69	3.26	Y	12.25	gulf	PEI	PEI	46.25	-63.10	11.31	21.50	0.00	0.66	38.05	19.00	1.00	1.10	72.12	100.00	0.00	0.29	2.00	1.00	1.00	0.95	0.00	20.00	0.00	0.00	17.14	5.40	1.00	0.69	3.00
charlottetown	charlottetown.D	3.03	3.26	N	12.25	gulf	PEI	PEI	46.30	-63.04	11.31	21.50	0.00	0.66	38.05	19.00	1.00	1.10	72.12	100.00	0.00	0.29	2.00	1.00	1.00	0.95	0.00	20.00	0.00	0.00	1.01	5.40	0.00	0.04	2.00
cocagne	cocagne.G	1.32	3.17	N	11.65	gulf	Gulf NS + NB	NB	46.33	-64.64	5.92	21.50	0.00	0.34	6.47	19.00	0.00	0.19	38.79	100.00	0.00	0.12	0.00	1.00	0.00	0.00	0.00	20.00	0.00	0.00	16.32	5.40	1.00	0.66	1.00
cocagne	cocagne.F	1.79	3.17	N	11.65	gulf	Gulf NS + NB	NB	46.33	-64.62	5.92	21.50	0.00	0.34	6.47	19.00	0.00	0.19	38.79	100.00	0.00	0.12	0.00	1.00	0.00	0.00	0.00	20.00	0.00	0.00	27.94	5.40	1.00	1.13	1.00
cocagne	cocagne.E	2.11	3.17	N	11.65	gulf	Gulf NS + NB	NB	46.33	-64.60	5.92	21.50	0.00	0.34	6.47	19.00	0.00	0.19	38.79	100.00	0.00	0.12	0.00	1.00	0.00	0.00	0.00	20.00	0.00	0.00	35.86	5.40	1.00	1.45	1.00
cocagne	cocagne.H	3.20	3.17	Y	11.65	gulf	Gulf NS + NB	NB	46.37	-64.62	5.92	21.50	0.00	0.34	6.47	19.00	0.00	0.19	38.79	100.00	0.00	0.12	0.00	1.00	0.00	0.00	0.00	20.00	0.00	0.00	62.80	5.40	1.00	2.55	1.00
cocagne	cocagne.A	2.91	3.17	N	11.65	gulf	Gulf NS + NB	NB	46.35	-64.57	5.92	21.50	0.00	0.34	6.47	19.00	0.00	0.19	38.79	100.00	0.00	0.12	0.00	1.00	0.00	0.00	0.00	20.00	0.00	0.00	55.66	5.40	1.00	2.26	1.00
cocagne	cocagne.B	1.07	3.17	N	11.65	gulf	Gulf NS + NB	NB	46.34	-64.57	5.92	21.50	0.00	0.34	6.47	19.00	0.00	0.19	38.79	100.00	0.00	0.12	0.00	1.00	0.00	0.00	0.00	20.00	0.00	0.00	10.35	5.40	1.00	0.42	1.00
cocagne	cocagne.D	1.24	3.17	N	11.65	gulf	Gulf NS + NB	NB	46.33	-64.58	5.92	21.50	0.00	0.34	6.47	19.00	0.00	0.19	38.79	100.00	0.00	0.12	0.00	1.00	0.00	0.00	0.00	20.00	0.00	0.00	14.40	5.40	1.00	0.58	1.00
cocagne	cocagne.C	0.86	3.17	N	11.65	gulf	Gulf NS + NB	NB	46.33	-64.57	5.92	21.50	0.00	0.34	6.47	19.00	0.00	0.19	38.79	100.00	0.00	0.12	0.00	1.00	0.00	0.00	0.00	20.00	0.00	0.00	4.97	5.40	0.00	0.20	0.00
covehead	covehead	3.45	3.26	Y	12.25	gulf	PEI	PEI	46.42	-63.17	30.55	21.50	1.00	1.77	14.34	19.00	0.00	0.41	172.72	100.00	1.00	0.70	1.00	1.00	1.00	0.47	0.00	20.00	0.00	0.00	2.23	5.40	0.00	0.09	3.00
crescent.beach	crescent.beach	3.75	3.17	Y	11.65	atlantic	Scotian Shelf	NS	44.24	-64.41	7.45	21.50	0.00	0.43	4.76	19.00	0.00	0.14	31.83	100.00	0.00	0.10	5.00	1.00	1.00	2.36	0.00	20.00	0.00	0.00	17.52	5.40	1.00	0.71	2.00
east.petpeswick	east.petpeswick	2.45	3.17	N	11.65	atlantic	Scotian Shelf	NS	44.71	-63.17	6.99	21.50	0.00	0.41	0.21	19.00	0.00	0.01	39.41	100.00	0.00	0.13	3.00	1.00	1.00	1.42	0.00	20.00	0.00	0.00	12.27	5.40	1.00	0.50	2.00
false.passage	false.passage	0.23	3.17	N	11.65	atlantic	Scotian Shelf	NS	44.74	-62.80	1.73	21.50	0.00	0.10	0.01	19.00	0.00	0.00	39.56	100.00	0.00	0.13	0.00	1.00	0.00	0.00	0.00	20.00	0.00	0.00	0.00	5.40	0.00	0.00	0.00
freeland	freeland	3.85	3.26	Y	12.25	gulf	PEI	PEI	46.68	-63.94	11.48	21.50	0.00	0.67	15.49	19.00	0.00	0.45	197.80	100.00	1.00	0.80	0.00	1.00	0.00	0.00	100.00	20.00	1.00	1.82	2.96	5.40	0.00	0.12	2.00
jordan.bay	jordan.bay	2.00	3.17	N	11.65	atlantic	Scotian Shelf	NS	43.72	-65.17	3.06	21.50	0.00	0.18	0.03	19.00	0.00	0.00	46.37	100.00	0.00	0.15	3.00	1.00	1.00	1.42	0.00	20.00	0.00	0.00	6.39	5.40	1.00	0.26	2.00
kildare	kildare	4.68	3.26	Y	12.25	gulf	PEI	PEI	46.83	-64.05	6.12	21.50	0.00	0.36	57.15	19.00	1.00	1.65	514.95	100.00	1.00	2.08	1.00	1.00	1.00	0.47	0.00	20.00	0.00	0.00	3.06	5.40	0.00	0.12	3.00
kouchibouguac	kouchibouguac.C	0.31	3.17	N	11.65	gulf	Gulf NS + NB	NB	46.84	-64.92	1.28	21.50	0.00	0.07	2.09	19.00	0.00	0.06	54.73	100.00	0.00	0.18	0.00	1.00	0.00	0.00	0.00	20.00	0.00	0.00	0.00	5.40	0.00	0.00	0.00
kouchibouguac	kouchibouguac.J	0.31	3.17	N	11.65	gulf	Gulf NS + NB	NB	46.84	-64.94	1.28	21.50	0.00	0.07	2.09	19.00	0.00	0.06	54.73	100.00	0.00	0.18	0.00	1.00	0.00	0.00	0.00	20.00	0.00	0.00	0.00	5.40	0.00	0.00	0.00
kouchibouguac	kouchibouguac.K	0.31	3.17	N	11.65	gulf	Gulf NS + NB	NB	46.84	-64.95	1.28	21.50	0.00	0.07	2.09	19.00	0.00	0.06	54.73	100.00	0.00	0.18	0.00	1.00	0.00	0.00	0.00	20.00	0.00	0.00	0.00	5.40	0.00	0.00	0.00
kouchibouguac	kouchibouguac.A	0.31	3.17	N	11.65	gulf	Gulf NS + NB	NB	46.83	-64.92	1.28	21.50	0.00	0.07	2.09	19.00	0.00	0.06	54.73	100.00	0.00	0.18	0.00	1.00	0.00	0.00	0.00	20.00	0.00	0.00	0.00	5.40	0.00	0.00	0.00
kouchibouguac	kouchibouguac.B	0.41	3.17	N	11.65	gulf	Gulf NS + NB	NB	46.84	-64.92	1.28	21.50	0.00	0.07	2.09	19.00	0.00	0.06	54.73	100.00	0.00	0.18	0.00	1.00	0.00	0.00	0.00	20.00	0.00	0.00	2.57	5.40	0.00	0.10	0.00
kouchibouguac	kouchibougauc.I	0.61	3.17	N	11.65	gulf	Gulf NS + NB	NB	46.84	-64.93	1.28	21.50	0.00	0.07	2.09	19.00	0.00	0.06	54.73	100.00	0.00	0.18	0.00	1.00	0.00	0.00	0.00	20.00	0.00	0.00	7.50	5.40	1.00	0.30	1.00
kouchibouguac	kouchibouguac.E	0.55	3.17	N	11.65	gulf	Gulf NS + NB	NB	46.83	-64.94	1.28	21.50	0.00	0.07	2.09	19.00	0.00	0.06	54.73	100.00	0.00	0.18	0.00	1.00	0.00	0.00	0.00	20.00	0.00	0.00	5.86	5.40	1.00	0.24	1.00
kouchibouguac	kouchibouguac.L	0.31	3.17	N	11.65	gulf	Gulf NS + NB	NB	46.85	-64.94	1.28	21.50	0.00	0.07	2.09	19.00	0.00	0.06	54.73	100.00	0.00	0.18	0.00	1.00	0.00	0.00	0.00	20.00	0.00	0.00	0.00	5.40	0.00	0.00	0.00
kouchibouguac	kouchibouguac.F	0.54	3.17	N	11.65	gulf	Gulf NS + NB	NB	46.83	-64.94	1.28	21.50	0.00	0.07	2.09	19.00	0.00	0.06	54.73	100.00	0.00	0.18	0.00	1.00	0.00	0.00	0.00	20.00	0.00	0.00	5.67	5.40	1.00	0.23	1.00
kouchibouguac	kouchibouguac.D	0.63	3.17	N	11.65	gulf	Gulf NS + NB	NB	46.83	-64.93	1.28	21.50	0.00	0.07	2.09	19.00	0.00	0.06	54.73	100.00	0.00	0.18	0.00	1.00	0.00	0.00	0.00	20.00	0.00	0.00	7.91	5.40	1.00	0.32	1.00
kouchibouguac	kouchibouguac.G	0.31	3.17	N	11.65	gulf	Gulf NS + NB	NB	46.83	-64.95	1.28	21.50	0.00	0.07	2.09	19.00	0.00	0.06	54.73	100.00	0.00	0.18	0.00	1.00	0.00	0.00	0.00	20.00	0.00	0.00	0.00	5.40	0.00	0.00	0.00
kouchibouguac	kouchibouguac.H	0.31	3.17	N	11.65	gulf	Gulf NS + NB	NB	46.83	-64.95	1.28	21.50	0.00	0.07	2.09	19.00	0.00	0.06	54.73	100.00	0.00	0.18	0.00	1.00	0.00	0.00	0.00	20.00	0.00	0.00	0.00	5.40	0.00	0.00	0.00
kouchibouguac	kouchibouguac.N	0.31	3.17	N	11.65	gulf	Gulf NS + NB	NB	46.87	-64.93	1.28	21.50	0.00	0.07	2.09	19.00	0.00	0.06	54.73	100.00	0.00	0.18	0.00	1.00	0.00	0.00	0.00	20.00	0.00	0.00	0.00	5.40	0.00	0.00	0.00
kouchibouguac	kouchibouguac.O	0.31	3.17	N	11.65	gulf	Gulf NS + NB	NB	46.87	-64.92	1.28	21.50	0.00	0.07	2.09	19.00	0.00	0.06	54.73	100.00	0.00	0.18	0.00	1.00	0.00	0.00	0.00	20.00	0.00	0.00	0.00	5.40	0.00	0.00	0.00
kouchibouguac	kouchibouguac.M	0.31	3.17	N	11.65	gulf	Gulf NS + NB	NB	46.86	-64.92	1.28	21.50	0.00	0.07	2.09	19.00	0.00	0.06	54.73	100.00	0.00	0.18	0.00	1.00	0.00	0.00	0.00	20.00	0.00	0.00	0.00	5.40	0.00	0.00	0.00
lameque	lameque.A	1.73	3.17	N	11.65	gulf	Gulf NS + NB	NB	47.79	-64.68	16.87	21.50	0.00	0.98	9.46	19.00	0.00	0.27	64.42	100.00	0.00	0.21	0.00	1.00	0.00	0.00	0.00	20.00	0.00	0.00	6.74	5.40	1.00	0.27	1.00
lameque	lameque.C	1.72	3.17	N	11.65	gulf	Gulf NS + NB	NB	47.79	-64.64	16.87	21.50	0.00	0.98	9.46	19.00	0.00	0.27	64.42	100.00	0.00	0.21	0.00	1.00	0.00	0.00	0.00	20.00	0.00	0.00	6.46	5.40	1.00	0.26	1.00
lameque	lameque.B	1.60	3.17	N	11.65	gulf	Gulf NS + NB	NB	47.80	-64.68	16.87	21.50	0.00	0.98	9.46	19.00	0.00	0.27	64.42	100.00	0.00	0.21	0.00	1.00	0.00	0.00	0.00	20.00	0.00	0.00	3.56	5.40	0.00	0.14	0.00
lameque	lameque.D	1.74	3.17	N	11.65	gulf	Gulf NS + NB	NB	47.78	-64.64	16.87	21.50	0.00	0.98	9.46	19.00	0.00	0.27	64.42	100.00	0.00	0.21	0.00	1.00	0.00	0.00	0.00	20.00	0.00	0.00	7.01	5.40	1.00	0.28	1.00
lower.three.fathom	lower.three.fathom	2.26	3.17	N	11.65	atlantic	Scotian Shelf	NS	44.64	-63.29	7.98	21.50	0.00	0.46	0.10	19.00	0.00	0.00	60.14	100.00	0.00	0.19	3.00	1.00	1.00	1.42	0.00	20.00	0.00	0.00	4.54	5.40	0.00	0.18	1.00
mabou	mabou.C	1.31	3.17	N	11.65	gulf	Gulf NS + NB	NS	46.07	-61.41	1.72	21.50	0.00	0.10	34.23	19.00	1.00	0.99	70.45	100.00	0.00	0.23	0.00	1.00	0.00	0.00	0.00	20.00	0.00	0.00	0.00	5.40	0.00	0.00	1.00
mabou	mabou.D	1.40	3.17	N	11.65	gulf	Gulf NS + NB	NS	46.07	-61.43	1.72	21.50	0.00	0.10	34.23	19.00	1.00	0.99	70.45	100.00	0.00	0.23	0.00	1.00	0.00	0.00	0.00	20.00	0.00	0.00	2.22	5.40	0.00	0.09	1.00
mabou	mabou.B	1.31	3.17	N	11.65	gulf	Gulf NS + NB	NS	46.08	-61.46	1.72	21.50	0.00	0.10	34.23	19.00	1.00	0.99	70.45	100.00	0.00	0.23	0.00	1.00	0.00	0.00	0.00	20.00	0.00	0.00	0.00	5.40	0.00	0.00	1.00
mabou	mabou.A	1.43	3.17	N	11.65	gulf	Gulf NS + NB	NS	46.09	-61.46	1.72	21.50	0.00	0.10	34.23	19.00	1.00	0.99	70.45	100.00	0.00	0.23	0.00	1.00	0.00	0.00	0.00	20.00	0.00	0.00	2.96	5.40	0.00	0.12	1.00
merrigomish	merrigomish.B	0.64	3.17	N	11.65	gulf	Gulf NS + NB	NS	45.63	-62.48	4.63	21.50	0.00	0.27	6.73	19.00	0.00	0.19	56.08	100.00	0.00	0.18	0.00	1.00	0.00	0.00	0.00	20.00	0.00	0.00	0.00	5.40	0.00	0.00	0.00
merrigomish	merrigomish.C	0.64	3.17	N	11.65	gulf	Gulf NS + NB	NS	45.68	-62.35	4.63	21.50	0.00	0.27	6.73	19.00	0.00	0.19	56.08	100.00	0.00	0.18	0.00	1.00	0.00	0.00	0.00	20.00	0.00	0.00	0.00	5.40	0.00	0.00	0.00
merrigomish	merrigomish.A	0.77	3.17	N	11.65	gulf	Gulf NS + NB	NS	45.60	-62.52	4.63	21.50	0.00	0.27	6.73	19.00	0.00	0.19	56.08	100.00	0.00	0.18	0.00	1.00	0.00	0.00	0.00	20.00	0.00	0.00	3.07	5.40	0.00	0.12	0.00
midgell	midgell	3.12	3.26	N	12.25	gulf	PEI	PEI	46.42	-62.65	4.38	21.50	0.00	0.25	29.40	19.00	1.00	0.85	157.01	100.00	1.00	0.63	2.00	1.00	1.00	0.95	0.00	20.00	0.00	0.00	10.81	5.40	1.00	0.44	4.00
mill.river	mill.river	4.36	3.26	Y	12.25	gulf	PEI	PEI	46.77	-64.08	4.78	21.50	0.00	0.28	48.16	19.00	1.00	1.39	637.42	100.00	1.00	2.57	0.00	1.00	0.00	0.00	0.00	20.00	0.00	0.00	3.02	5.40	0.00	0.12	2.00
montague	montague.E	5.96	3.26	Y	12.25	gulf	PEI	PEI	46.17	-62.56	7.04	21.50	0.00	0.41	34.67	19.00	1.00	1.00	653.41	100.00	1.00	2.64	3.00	1.00	1.00	1.42	0.00	20.00	0.00	0.00	12.25	5.40	1.00	0.50	4.00
montague	montague.F	5.75	3.26	Y	12.25	gulf	PEI	PEI	46.18	-62.56	7.04	21.50	0.00	0.41	34.67	19.00	1.00	1.00	653.41	100.00	1.00	2.64	3.00	1.00	1.00	1.42	0.00	20.00	0.00	0.00	7.04	5.40	1.00	0.29	4.00
montague	montague.D	5.59	3.26	Y	12.25	gulf	PEI	PEI	46.18	-62.57	7.04	21.50	0.00	0.41	34.67	19.00	1.00	1.00	653.41	100.00	1.00	2.64	3.00	1.00	1.00	1.42	0.00	20.00	0.00	0.00	3.19	5.40	0.00	0.13	3.00
montague	montague.C	5.61	3.26	Y	12.25	gulf	PEI	PEI	46.17	-62.58	7.04	21.50	0.00	0.41	34.67	19.00	1.00	1.00	653.41	100.00	1.00	2.64	3.00	1.00	1.00	1.42	0.00	20.00	0.00	0.00	3.70	5.40	0.00	0.15	3.00
montague	montague.B	5.71	3.26	Y	12.25	gulf	PEI	PEI	46.17	-62.59	7.04	21.50	0.00	0.41	34.67	19.00	1.00	1.00	653.41	100.00	1.00	2.64	3.00	1.00	1.00	1.42	0.00	20.00	0.00	0.00	6.12	5.40	1.00	0.25	4.00
montague	montague.A	5.76	3.26	Y	12.25	gulf	PEI	PEI	46.18	-62.60	7.04	21.50	0.00	0.41	34.67	19.00	1.00	1.00	653.41	100.00	1.00	2.64	3.00	1.00	1.00	1.42	0.00	20.00	0.00	0.00	7.17	5.40	1.00	0.29	4.00
musquodoboit	musquodoboit	0.83	3.17	N	11.65	atlantic	Scotian Shelf	NS	44.71	-63.09	7.20	21.50	0.00	0.42	2.20	19.00	0.00	0.06	108.56	100.00	1.00	0.35	0.00	1.00	0.00	0.00	0.00	20.00	0.00	0.00	0.00	5.40	0.00	0.00	1.00
neguac	neguac.B	4.14	3.17	Y	11.65	gulf	Gulf NS + NB	NB	47.25	-65.06	1.50	21.50	0.00	0.09	0.80	19.00	0.00	0.02	85.40	100.00	0.00	0.27	0.00	1.00	0.00	0.00	100.00	20.00	1.00	1.82	47.72	5.40	1.00	1.93	2.00
neguac	neguac.A	1.22	3.17	N	11.65	gulf	Gulf NS + NB	NB	47.23	-65.08	1.50	21.50	0.00	0.09	0.80	19.00	0.00	0.02	85.40	100.00	0.00	0.27	0.00	1.00	0.00	0.00	34.46	20.00	1.00	0.63	5.26	5.40	0.00	0.21	1.00
pictou	pictou.B	3.25	3.17	Y	11.65	gulf	Gulf NS + NB	NS	45.67	-62.72	9.37	21.50	0.00	0.54	7.90	19.00	0.00	0.23	106.31	100.00	1.00	0.34	0.00	1.00	0.00	0.00	0.00	20.00	0.00	0.00	52.80	5.40	1.00	2.14	2.00
pictou	pictou.D	1.11	3.17	N	11.65	gulf	Gulf NS + NB	NS	45.67	-62.69	9.37	21.50	0.00	0.54	7.90	19.00	0.00	0.23	106.31	100.00	1.00	0.34	0.00	1.00	0.00	0.00	0.00	20.00	0.00	0.00	0.00	5.40	0.00	0.00	1.00
pictou	pictou.A	3.07	3.17	N	11.65	gulf	Gulf NS + NB	NS	45.68	-62.69	9.37	21.50	0.00	0.54	7.90	19.00	0.00	0.23	106.31	100.00	1.00	0.34	0.00	1.00	0.00	0.00	0.00	20.00	0.00	0.00	48.23	5.40	1.00	1.95	2.00
pictou	pictou.C	1.77	3.17	N	11.65	gulf	Gulf NS + NB	NS	45.68	-62.74	9.37	21.50	0.00	0.54	7.90	19.00	0.00	0.23	106.31	100.00	1.00	0.34	0.00	1.00	0.00	0.00	0.00	20.00	0.00	0.00	16.22	5.40	1.00	0.66	2.00
pinette.river	pinette.river.A	1.86	3.26	N	12.25	gulf	PEI	PEI	46.06	-62.93	5.05	21.50	0.00	0.29	30.29	19.00	1.00	0.88	121.30	100.00	1.00	0.49	0.00	1.00	0.00	0.00	0.00	20.00	0.00	0.00	4.95	5.40	0.00	0.20	2.00
pinette.river	pinette.river.D	2.15	3.26	N	12.25	gulf	PEI	PEI	46.06	-62.91	5.05	21.50	0.00	0.29	30.29	19.00	1.00	0.88	121.30	100.00	1.00	0.49	0.00	1.00	0.00	0.00	0.00	20.00	0.00	0.00	12.22	5.40	1.00	0.50	3.00
pinette.river	pinette.river.C	2.15	3.26	N	12.25	gulf	PEI	PEI	46.06	-62.91	5.05	21.50	0.00	0.29	30.29	19.00	1.00	0.88	121.30	100.00	1.00	0.49	0.00	1.00	0.00	0.00	0.00	20.00	0.00	0.00	12.22	5.40	1.00	0.50	3.00
pinette.river	pinette.river.B	2.06	3.26	N	12.25	gulf	PEI	PEI	46.05	-62.91	5.05	21.50	0.00	0.29	30.29	19.00	1.00	0.88	121.30	100.00	1.00	0.49	0.00	1.00	0.00	0.00	0.00	20.00	0.00	0.00	9.94	5.40	1.00	0.40	3.00
pokemouche	pokemouche	1.21	3.17	N	11.65	gulf	Gulf NS + NB	NB	47.67	-64.82	7.00	21.50	0.00	0.41	8.96	19.00	0.00	0.26	57.17	100.00	0.00	0.18	0.00	1.00	0.00	0.00	0.00	20.00	0.00	0.00	8.86	5.40	1.00	0.36	1.00
port.joli	port.joli.A	1.69	3.17	N	11.65	atlantic	Scotian Shelf	NS	43.84	-64.88	2.84	21.50	0.00	0.16	0.00	19.00	0.00	0.00	34.05	100.00	0.00	0.11	3.00	1.00	1.00	1.42	0.00	20.00	0.00	0.00	0.00	5.40	0.00	0.00	1.00
port.joli	port.joli.B	1.69	3.17	N	11.65	atlantic	Scotian Shelf	NS	43.88	-64.90	2.84	21.50	0.00	0.16	0.00	19.00	0.00	0.00	34.05	100.00	0.00	0.11	3.00	1.00	1.00	1.42	0.00	20.00	0.00	0.00	0.00	5.40	0.00	0.00	1.00
port.joli	port.joli.C	1.69	3.17	N	11.65	atlantic	Scotian Shelf	NS	43.87	-64.90	2.84	21.50	0.00	0.16	0.00	19.00	0.00	0.00	34.05	100.00	0.00	0.11	3.00	1.00	1.00	1.42	0.00	20.00	0.00	0.00	0.00	5.40	0.00	0.00	1.00
port.lhebert	port.lhebert	2.43	3.17	N	11.65	atlantic	Scotian Shelf	NS	43.87	-64.96	6.78	21.50	0.00	0.39	0.16	19.00	0.00	0.00	44.81	100.00	0.00	0.14	4.00	1.00	1.00	1.89	0.00	20.00	0.00	0.00	0.00	5.40	0.00	0.00	1.00
port.mouton	port.mouton.C	1.22	3.17	N	11.65	atlantic	Scotian Shelf	NS	43.92	-64.81	2.09	21.50	0.00	0.12	0.00	19.00	0.00	0.00	48.57	100.00	0.00	0.16	2.00	1.00	1.00	0.95	0.00	20.00	0.00	0.00	0.00	5.40	0.00	0.00	1.00
port.mouton	port.mouton.B	2.06	3.17	N	11.65	atlantic	Scotian Shelf	NS	43.93	-64.85	2.09	21.50	0.00	0.12	0.00	19.00	0.00	0.00	48.57	100.00	0.00	0.16	2.00	1.00	1.00	0.95	0.00	20.00	0.00	0.00	20.67	5.40	1.00	0.84	2.00
port.mouton	port.mouton.A	1.22	3.17	N	11.65	atlantic	Scotian Shelf	NS	43.91	-64.82	2.09	21.50	0.00	0.12	0.00	19.00	0.00	0.00	48.57	100.00	0.00	0.16	2.00	1.00	1.00	0.95	0.00	20.00	0.00	0.00	0.00	5.40	0.00	0.00	1.00
pugwash	pugwash.D	1.63	3.17	N	11.65	gulf	Gulf NS + NB	NS	45.85	-63.67	3.38	21.50	0.00	0.20	12.36	19.00	0.00	0.36	56.27	100.00	0.00	0.18	0.00	1.00	0.00	0.00	0.00	20.00	0.00	0.00	22.08	5.40	1.00	0.89	1.00
pugwash	pugwash.A	1.56	3.17	N	11.65	gulf	Gulf NS + NB	NS	45.85	-63.66	3.38	21.50	0.00	0.20	12.36	19.00	0.00	0.36	56.27	100.00	0.00	0.18	0.00	1.00	0.00	0.00	0.00	20.00	0.00	0.00	20.44	5.40	1.00	0.83	1.00
pugwash	pugwash.B	1.57	3.17	N	11.65	gulf	Gulf NS + NB	NS	45.85	-63.66	3.38	21.50	0.00	0.20	12.36	19.00	0.00	0.36	56.27	100.00	0.00	0.18	0.00	1.00	0.00	0.00	0.00	20.00	0.00	0.00	20.70	5.40	1.00	0.84	1.00
pugwash	pugwash.C	0.78	3.17	N	11.65	gulf	Gulf NS + NB	NS	45.81	-63.66	3.38	21.50	0.00	0.20	12.36	19.00	0.00	0.36	56.27	100.00	0.00	0.18	0.00	1.00	0.00	0.00	0.00	20.00	0.00	0.00	1.04	5.40	0.00	0.04	0.00
richiboucto	richiboucto.B	0.50	3.17	N	11.65	gulf	Gulf NS + NB	NB	46.69	-64.78	3.51	21.50	0.00	0.20	4.52	19.00	0.00	0.13	51.78	100.00	0.00	0.17	0.00	1.00	0.00	0.00	0.00	20.00	0.00	0.00	0.00	5.40	0.00	0.00	0.00
richiboucto	richiboucto.F	0.97	3.17	N	11.65	gulf	Gulf NS + NB	NB	46.69	-64.86	3.51	21.50	0.00	0.20	4.52	19.00	0.00	0.13	51.78	100.00	0.00	0.17	0.00	1.00	0.00	0.00	0.00	20.00	0.00	0.00	11.55	5.40	1.00	0.47	1.00
richiboucto	richiboucto.E	0.50	3.17	N	11.65	gulf	Gulf NS + NB	NB	46.69	-64.85	3.51	21.50	0.00	0.20	4.52	19.00	0.00	0.13	51.78	100.00	0.00	0.17	0.00	1.00	0.00	0.00	0.00	20.00	0.00	0.00	0.00	5.40	0.00	0.00	0.00
richiboucto	richiboucto.C	1.67	3.17	N	11.65	gulf	Gulf NS + NB	NB	46.69	-64.80	3.51	21.50	0.00	0.20	4.52	19.00	0.00	0.13	51.78	100.00	0.00	0.17	0.00	1.00	0.00	0.00	27.79	20.00	1.00	0.51	16.38	5.40	1.00	0.66	2.00
richiboucto	richiboucto.D	0.71	3.17	N	11.65	gulf	Gulf NS + NB	NB	46.70	-64.80	3.51	21.50	0.00	0.20	4.52	19.00	0.00	0.13	51.78	100.00	0.00	0.17	0.00	1.00	0.00	0.00	0.00	20.00	0.00	0.00	5.14	5.40	0.00	0.21	0.00
richiboucto	richiboucto.A	0.50	3.17	N	11.65	gulf	Gulf NS + NB	NB	46.70	-64.76	3.51	21.50	0.00	0.20	4.52	19.00	0.00	0.13	51.78	100.00	0.00	0.17	0.00	1.00	0.00	0.00	0.00	20.00	0.00	0.00	0.00	5.40	0.00	0.00	0.00
richiboucto	richiboucto.G	0.53	3.17	N	11.65	gulf	Gulf NS + NB	NB	46.70	-64.86	3.51	21.50	0.00	0.20	4.52	19.00	0.00	0.13	51.78	100.00	0.00	0.17	0.00	1.00	0.00	0.00	1.74	20.00	0.00	0.03	0.00	5.40	0.00	0.00	0.00
richiboucto	richiboucto.I	2.20	3.17	N	11.65	gulf	Gulf NS + NB	NB	46.72	-64.89	3.51	21.50	0.00	0.20	4.52	19.00	0.00	0.13	51.78	100.00	0.00	0.17	0.00	1.00	0.00	0.00	92.82	20.00	1.00	1.69	0.26	5.40	0.00	0.01	1.00
richiboucto	richiboucto.H	2.69	3.17	N	11.65	gulf	Gulf NS + NB	NB	46.71	-64.87	3.51	21.50	0.00	0.20	4.52	19.00	0.00	0.13	51.78	100.00	0.00	0.17	0.00	1.00	0.00	0.00	100.00	20.00	1.00	1.82	9.28	5.40	1.00	0.38	2.00
river.philip	river.philip.A	3.15	3.17	N	11.65	gulf	Gulf NS + NB	NS	45.85	-63.74	3.47	21.50	0.00	0.20	67.58	19.00	1.00	1.95	215.50	100.00	1.00	0.69	0.00	1.00	0.00	0.00	0.00	20.00	0.00	0.00	7.63	5.40	1.00	0.31	3.00
river.philip	river.philip.B	3.25	3.17	Y	11.65	gulf	Gulf NS + NB	NS	45.85	-63.75	3.47	21.50	0.00	0.20	67.58	19.00	1.00	1.95	215.50	100.00	1.00	0.69	0.00	1.00	0.00	0.00	0.00	20.00	0.00	0.00	9.97	5.40	1.00	0.40	3.00
rustico	rustico.B	3.41	3.26	Y	12.25	gulf	PEI	PEI	46.42	-63.24	8.40	21.50	0.00	0.49	64.02	19.00	1.00	1.85	149.19	100.00	1.00	0.60	1.00	1.00	1.00	0.47	0.00	20.00	0.00	0.00	0.00	5.40	0.00	0.00	3.00
rustico	rustico.A	3.41	3.26	Y	12.25	gulf	PEI	PEI	46.43	-63.27	8.40	21.50	0.00	0.49	64.02	19.00	1.00	1.85	149.19	100.00	1.00	0.60	1.00	1.00	1.00	0.47	0.00	20.00	0.00	0.00	0.00	5.40	0.00	0.00	3.00
sambro	sambro	1.65	3.17	N	11.65	atlantic	Scotian Shelf	NS	44.46	-63.59	8.94	21.50	0.00	0.52	0.04	19.00	0.00	0.00	57.76	100.00	0.00	0.18	2.00	1.00	1.00	0.95	0.00	20.00	0.00	0.00	0.00	5.40	0.00	0.00	1.00
second.peninsula	second.peninsula.A	2.68	3.17	N	11.65	atlantic	Scotian Shelf	NS	44.40	-64.28	10.90	21.50	0.00	0.63	10.96	19.00	0.00	0.32	46.63	100.00	0.00	0.15	2.00	1.00	1.00	0.95	0.00	20.00	0.00	0.00	15.77	5.40	1.00	0.64	2.00
second.peninsula	second.peninsula.B	2.38	3.17	N	11.65	atlantic	Scotian Shelf	NS	44.39	-64.28	10.90	21.50	0.00	0.63	10.96	19.00	0.00	0.32	46.63	100.00	0.00	0.15	2.00	1.00	1.00	0.95	0.00	20.00	0.00	0.00	8.36	5.40	1.00	0.34	2.00
second.peninsula	second.peninsula.C	2.04	3.17	N	11.65	atlantic	Scotian Shelf	NS	44.40	-64.24	10.90	21.50	0.00	0.63	10.96	19.00	0.00	0.32	46.63	100.00	0.00	0.15	2.00	1.00	1.00	0.95	0.00	20.00	0.00	0.00	0.00	5.40	0.00	0.00	1.00
shediac	shediac.D	2.43	3.17	N	11.65	gulf	Gulf NS + NB	NB	46.27	-64.57	0.27	21.50	0.00	0.02	15.41	19.00	0.00	0.45	53.18	100.00	0.00	0.17	1.00	1.00	1.00	0.47	0.00	20.00	0.00	0.00	32.73	5.40	1.00	1.33	2.00
shediac	shediac.E	2.25	3.17	N	11.65	gulf	Gulf NS + NB	NB	46.28	-64.57	0.27	21.50	0.00	0.02	15.41	19.00	0.00	0.45	53.18	100.00	0.00	0.17	1.00	1.00	1.00	0.47	0.00	20.00	0.00	0.00	28.38	5.40	1.00	1.15	2.00
shediac	shediac.C	2.22	3.17	N	11.65	gulf	Gulf NS + NB	NB	46.27	-64.58	0.27	21.50	0.00	0.02	15.41	19.00	0.00	0.45	53.18	100.00	0.00	0.17	1.00	1.00	1.00	0.47	0.00	20.00	0.00	0.00	27.48	5.40	1.00	1.11	2.00
shediac	shediac.A	2.68	3.17	N	11.65	gulf	Gulf NS + NB	NB	46.24	-64.52	0.27	21.50	0.00	0.02	15.41	19.00	0.00	0.45	53.18	100.00	0.00	0.17	1.00	1.00	1.00	0.47	0.00	20.00	0.00	0.00	38.97	5.40	1.00	1.58	2.00
shediac	shediac.B	2.74	3.17	N	11.65	gulf	Gulf NS + NB	NB	46.26	-64.56	0.27	21.50	0.00	0.02	15.41	19.00	0.00	0.45	53.18	100.00	0.00	0.17	1.00	1.00	1.00	0.47	0.00	20.00	0.00	0.00	40.49	5.40	1.00	1.64	2.00
souris	souris.C	4.91	3.26	Y	12.25	gulf	PEI	PEI	46.37	-62.28	8.56	21.50	0.00	0.50	39.26	19.00	1.00	1.13	418.96	100.00	1.00	1.69	3.00	1.00	1.00	1.42	0.00	20.00	0.00	0.00	4.31	5.40	0.00	0.17	3.00
souris	souris.B	4.95	3.26	Y	12.25	gulf	PEI	PEI	46.36	-62.28	8.56	21.50	0.00	0.50	39.26	19.00	1.00	1.13	418.96	100.00	1.00	1.69	3.00	1.00	1.00	1.42	0.00	20.00	0.00	0.00	5.23	5.40	0.00	0.21	3.00
souris	souris.A	7.05	3.26	Y	12.25	gulf	PEI	PEI	46.35	-62.28	8.56	21.50	0.00	0.50	39.26	19.00	1.00	1.13	418.96	100.00	1.00	1.69	3.00	1.00	1.00	1.42	100.00	20.00	1.00	1.82	12.16	5.40	1.00	0.49	5.00
south.lake	south.lake.C	3.94	3.26	Y	12.25	gulf	PEI	PEI	46.41	-62.05	6.57	21.50	0.00	0.38	40.44	19.00	1.00	1.17	123.19	100.00	1.00	0.50	4.00	1.00	1.00	1.89	0.00	20.00	0.00	0.00	0.00	5.40	0.00	0.00	3.00
south.lake	south.lake.B	5.35	3.26	Y	12.25	gulf	PEI	PEI	46.41	-62.05	6.57	21.50	0.00	0.38	40.44	19.00	1.00	1.17	123.19	100.00	1.00	0.50	4.00	1.00	1.00	1.89	77.88	20.00	1.00	1.42	0.00	5.40	0.00	0.00	4.00
south.lake	south.lake.A	4.92	3.26	Y	12.25	gulf	PEI	PEI	46.41	-62.04	6.57	21.50	0.00	0.38	40.44	19.00	1.00	1.17	123.19	100.00	1.00	0.50	4.00	1.00	1.00	1.89	54.16	20.00	1.00	0.98	0.00	5.40	0.00	0.00	4.00
southwest	southwest	4.33	3.26	Y	12.25	gulf	PEI	PEI	46.48	-63.50	10.26	21.50	0.00	0.60	69.23	19.00	1.00	2.00	353.01	100.00	1.00	1.42	0.00	1.00	0.00	0.00	0.00	20.00	0.00	0.00	7.76	5.40	1.00	0.31	3.00
st.louis.de.kent	st.louis.de.kent.C	0.45	3.17	N	11.65	gulf	Gulf NS + NB	NB	46.75	-64.97	2.49	21.50	0.00	0.14	2.36	19.00	0.00	0.07	26.88	100.00	0.00	0.09	0.00	1.00	0.00	0.00	0.00	20.00	0.00	0.00	3.62	5.40	0.00	0.15	0.00
st.louis.de.kent	st.louis.de.kent.A	0.49	3.17	N	11.65	gulf	Gulf NS + NB	NB	46.77	-64.91	2.49	21.50	0.00	0.14	2.36	19.00	0.00	0.07	26.88	100.00	0.00	0.09	0.00	1.00	0.00	0.00	0.00	20.00	0.00	0.00	4.75	5.40	0.00	0.19	0.00
st.louis.de.kent	st.louis.de.kent.B	0.51	3.17	N	11.65	gulf	Gulf NS + NB	NB	46.76	-64.92	2.49	21.50	0.00	0.14	2.36	19.00	0.00	0.07	26.88	100.00	0.00	0.09	0.00	1.00	0.00	0.00	0.00	20.00	0.00	0.00	5.14	5.40	0.00	0.21	0.00
st.margarets.bay	st.margarets.bay.B	2.94	3.17	N	11.65	atlantic	Scotian Shelf	NS	44.64	-63.96	7.56	21.50	0.00	0.44	0.00	19.00	0.00	0.00	43.66	100.00	0.00	0.14	5.00	1.00	1.00	2.36	0.00	20.00	0.00	0.00	0.00	5.40	0.00	0.00	1.00
st.margarets.bay	st.margarets.bay.A	3.02	3.17	N	11.65	atlantic	Scotian Shelf	NS	44.65	-63.95	7.56	21.50	0.00	0.44	0.00	19.00	0.00	0.00	43.66	100.00	0.00	0.14	5.00	1.00	1.00	2.36	0.00	20.00	0.00	0.00	2.03	5.40	0.00	0.08	1.00
st.margarets.bay	st.margarets.bay.C	2.94	3.17	N	11.65	atlantic	Scotian Shelf	NS	44.59	-63.94	7.56	21.50	0.00	0.44	0.00	19.00	0.00	0.00	43.66	100.00	0.00	0.14	5.00	1.00	1.00	2.36	0.00	20.00	0.00	0.00	0.00	5.40	0.00	0.00	1.00
st.marys.bay	st.marys.bay.H	2.93	3.26	N	12.25	gulf	PEI	PEI	46.12	-62.53	5.67	21.50	0.00	0.33	23.65	19.00	1.00	0.68	66.28	100.00	0.00	0.27	3.00	1.00	1.00	1.42	0.00	20.00	0.00	0.00	5.77	5.40	1.00	0.23	3.00
st.marys.bay	st.marys.bay.I	3.46	3.26	Y	12.25	gulf	PEI	PEI	46.16	-62.53	5.67	21.50	0.00	0.33	23.65	19.00	1.00	0.68	66.28	100.00	0.00	0.27	3.00	1.00	1.00	1.42	0.00	20.00	0.00	0.00	18.70	5.40	1.00	0.76	3.00
st.marys.bay	st.marys.bay.B	3.31	3.26	Y	12.25	gulf	PEI	PEI	46.13	-62.47	5.67	21.50	0.00	0.33	23.65	19.00	1.00	0.68	66.28	100.00	0.00	0.27	3.00	1.00	1.00	1.42	0.00	20.00	0.00	0.00	15.17	5.40	1.00	0.61	3.00
st.marys.bay	st.marys.bay.J	4.49	3.26	Y	12.25	gulf	PEI	PEI	46.17	-62.54	5.67	21.50	0.00	0.33	23.65	19.00	1.00	0.68	66.28	100.00	0.00	0.27	3.00	1.00	1.00	1.42	0.00	20.00	0.00	0.00	44.31	5.40	1.00	1.80	3.00
st.marys.bay	st.marys.bay.E	2.95	3.26	N	12.25	gulf	PEI	PEI	46.12	-62.49	5.67	21.50	0.00	0.33	23.65	19.00	1.00	0.68	66.28	100.00	0.00	0.27	3.00	1.00	1.00	1.42	0.00	20.00	0.00	0.00	6.17	5.40	1.00	0.25	3.00
st.marys.bay	st.marys.bay.C	3.95	3.26	Y	12.25	gulf	PEI	PEI	46.13	-62.47	5.67	21.50	0.00	0.33	23.65	19.00	1.00	0.68	66.28	100.00	0.00	0.27	3.00	1.00	1.00	1.42	0.00	20.00	0.00	0.00	30.90	5.40	1.00	1.25	3.00
st.marys.bay	st.marys.bay.D	3.19	3.26	N	12.25	gulf	PEI	PEI	46.12	-62.48	5.67	21.50	0.00	0.33	23.65	19.00	1.00	0.68	66.28	100.00	0.00	0.27	3.00	1.00	1.00	1.42	0.00	20.00	0.00	0.00	12.11	5.40	1.00	0.49	3.00
st.marys.bay	st.marys.bay.A	2.83	3.26	N	12.25	gulf	PEI	PEI	46.14	-62.50	5.67	21.50	0.00	0.33	23.65	19.00	1.00	0.68	66.28	100.00	0.00	0.27	3.00	1.00	1.00	1.42	0.00	20.00	0.00	0.00	3.19	5.40	0.00	0.13	2.00
st.marys.bay	st.marys.bay.G	2.92	3.26	N	12.25	gulf	PEI	PEI	46.12	-62.53	5.67	21.50	0.00	0.33	23.65	19.00	1.00	0.68	66.28	100.00	0.00	0.27	3.00	1.00	1.00	1.42	0.00	20.00	0.00	0.00	5.61	5.40	1.00	0.23	3.00
st.marys.bay	st.marys.bay.F	2.70	3.26	N	12.25	gulf	PEI	PEI	46.11	-62.50	5.67	21.50	0.00	0.33	23.65	19.00	1.00	0.68	66.28	100.00	0.00	0.27	3.00	1.00	1.00	1.42	0.00	20.00	0.00	0.00	0.00	5.40	0.00	0.00	2.00
st.simon.north	st.simon.north.B	0.14	3.17	N	11.65	gulf	Gulf NS + NB	NB	47.75	-64.83	1.29	21.50	0.00	0.07	0.04	19.00	0.00	0.00	18.94	100.00	0.00	0.06	0.00	1.00	0.00	0.00	0.00	20.00	0.00	0.00	0.00	5.40	0.00	0.00	0.00
st.simon.north	st.simon.north.A	1.95	3.17	N	11.65	gulf	Gulf NS + NB	NB	47.75	-64.81	1.29	21.50	0.00	0.07	0.04	19.00	0.00	0.00	18.94	100.00	0.00	0.06	0.00	1.00	0.00	0.00	100.00	20.00	1.00	1.82	0.00	5.40	0.00	0.00	1.00
st.simon.south	st.simon.south.A	2.08	3.17	N	11.65	gulf	Gulf NS + NB	NB	47.73	-64.78	1.29	21.50	0.00	0.07	0.04	19.00	0.00	0.00	18.94	100.00	0.00	0.06	0.00	1.00	0.00	0.00	100.00	20.00	1.00	1.82	2.99	5.40	0.00	0.12	1.00
st.simon.south	st.simon.south.B	1.95	3.17	N	11.65	gulf	Gulf NS + NB	NB	47.72	-64.76	1.29	21.50	0.00	0.07	0.04	19.00	0.00	0.00	18.94	100.00	0.00	0.06	0.00	1.00	0.00	0.00	100.00	20.00	1.00	1.82	0.00	5.40	0.00	0.00	1.00
stanley.trout	stanley.trout.A	3.30	3.26	Y	12.25	gulf	PEI	PEI	46.44	-63.47	8.95	21.50	0.00	0.52	48.88	19.00	1.00	1.41	189.59	100.00	1.00	0.76	1.00	1.00	1.00	0.47	0.00	20.00	0.00	0.00	3.14	5.40	0.00	0.13	3.00
stanley.trout	stanley.trout.E	3.68	3.26	Y	12.25	gulf	PEI	PEI	46.47	-63.45	8.95	21.50	0.00	0.52	48.88	19.00	1.00	1.41	189.59	100.00	1.00	0.76	1.00	1.00	1.00	0.47	0.00	20.00	0.00	0.00	12.68	5.40	1.00	0.51	4.00
stanley.trout	stanley.trout.B	3.30	3.26	Y	12.25	gulf	PEI	PEI	46.45	-63.47	8.95	21.50	0.00	0.52	48.88	19.00	1.00	1.41	189.59	100.00	1.00	0.76	1.00	1.00	1.00	0.47	0.00	20.00	0.00	0.00	3.13	5.40	0.00	0.13	3.00
stanley.trout	stanley.trout.C	3.60	3.26	Y	12.25	gulf	PEI	PEI	46.46	-63.46	8.95	21.50	0.00	0.52	48.88	19.00	1.00	1.41	189.59	100.00	1.00	0.76	1.00	1.00	1.00	0.47	0.00	20.00	0.00	0.00	10.59	5.40	1.00	0.43	4.00
stanley.trout	stanley.trout.D	3.86	3.26	Y	12.25	gulf	PEI	PEI	46.47	-63.46	8.95	21.50	0.00	0.52	48.88	19.00	1.00	1.41	189.59	100.00	1.00	0.76	1.00	1.00	1.00	0.47	0.05	20.00	0.00	0.00	16.91	5.40	1.00	0.69	4.00
tabusintac	tabusintac.A	0.46	3.17	N	11.65	gulf	Gulf NS + NB	NB	47.34	-64.97	2.08	21.50	0.00	0.12	3.51	19.00	0.00	0.10	35.63	100.00	0.00	0.11	0.00	1.00	0.00	0.00	0.00	20.00	0.00	0.00	3.09	5.40	0.00	0.13	0.00
tabusintac	tabusintac.E	0.41	3.17	N	11.65	gulf	Gulf NS + NB	NB	47.38	-64.94	2.08	21.50	0.00	0.12	3.51	19.00	0.00	0.10	35.63	100.00	0.00	0.11	0.00	1.00	0.00	0.00	0.00	20.00	0.00	0.00	1.83	5.40	0.00	0.07	0.00
tabusintac	tabusintac.B	0.43	3.17	N	11.65	gulf	Gulf NS + NB	NB	47.35	-64.96	2.08	21.50	0.00	0.12	3.51	19.00	0.00	0.10	35.63	100.00	0.00	0.11	0.00	1.00	0.00	0.00	2.41	20.00	0.00	0.04	1.32	5.40	0.00	0.05	0.00
tabusintac	tabusintac.C	1.73	3.17	N	11.65	gulf	Gulf NS + NB	NB	47.35	-64.95	2.08	21.50	0.00	0.12	3.51	19.00	0.00	0.10	35.63	100.00	0.00	0.11	0.00	1.00	0.00	0.00	76.67	20.00	1.00	1.39	0.00	5.40	0.00	0.00	1.00
tabusintac	tabusintac.D	2.23	3.17	N	11.65	gulf	Gulf NS + NB	NB	47.37	-64.94	2.08	21.50	0.00	0.12	3.51	19.00	0.00	0.10	35.63	100.00	0.00	0.11	0.00	1.00	0.00	0.00	100.00	20.00	1.00	1.82	1.91	5.40	0.00	0.08	1.00
taylors.head	taylors.head.A	2.05	3.17	N	11.65	atlantic	Scotian Shelf	NS	44.82	-62.58	2.58	21.50	0.00	0.15	0.00	19.00	0.00	0.00	31.32	100.00	0.00	0.10	0.00	1.00	0.00	0.00	0.00	20.00	0.00	0.00	44.46	5.40	1.00	1.80	1.00
taylors.head	taylors.head.B	1.69	3.17	N	11.65	atlantic	Scotian Shelf	NS	44.82	-62.57	2.58	21.50	0.00	0.15	0.00	19.00	0.00	0.00	31.32	100.00	0.00	0.10	0.00	1.00	0.00	0.00	0.00	20.00	0.00	0.00	35.46	5.40	1.00	1.44	1.00
tatamagouche	tatamagouche.B	0.88	3.17	N	11.65	gulf	Gulf NS + NB	NS	45.76	-63.08	2.68	21.50	0.00	0.16	13.25	19.00	0.00	0.38	34.63	100.00	0.00	0.11	0.00	1.00	0.00	0.00	0.00	20.00	0.00	0.00	5.63	5.40	1.00	0.23	1.00
tatamagouche	tatamagouche.A	1.01	3.17	N	11.65	gulf	Gulf NS + NB	NS	45.76	-63.34	2.68	21.50	0.00	0.16	13.25	19.00	0.00	0.38	34.63	100.00	0.00	0.11	0.00	1.00	0.00	0.00	0.00	20.00	0.00	0.00	8.80	5.40	1.00	0.36	1.00
tracadie	tracadie.A	1.23	3.17	N	11.65	gulf	Gulf NS + NB	NB	47.46	-64.89	5.78	21.50	0.00	0.34	9.35	19.00	0.00	0.27	49.17	100.00	0.00	0.16	0.00	1.00	0.00	0.00	0.00	20.00	0.00	0.00	11.48	5.40	1.00	0.47	1.00
tracadie	tracadie.B	0.83	3.17	N	11.65	gulf	Gulf NS + NB	NB	47.47	-64.87	5.78	21.50	0.00	0.34	9.35	19.00	0.00	0.27	49.17	100.00	0.00	0.16	0.00	1.00	0.00	0.00	0.00	20.00	0.00	0.00	1.55	5.40	0.00	0.06	0.00
tracadie	tracadie.D	0.76	3.17	N	11.65	gulf	Gulf NS + NB	NB	47.53	-64.89	5.78	21.50	0.00	0.34	9.35	19.00	0.00	0.27	49.17	100.00	0.00	0.16	0.00	1.00	0.00	0.00	0.00	20.00	0.00	0.00	0.00	5.40	0.00	0.00	0.00
tracadie	tracadie.C	1.24	3.17	N	11.65	gulf	Gulf NS + NB	NB	47.52	-64.90	5.78	21.50	0.00	0.34	9.35	19.00	0.00	0.27	49.17	100.00	0.00	0.16	0.00	1.00	0.00	0.00	0.00	20.00	0.00	0.00	11.82	5.40	1.00	0.48	1.00
tracadie	tracadie.E	0.81	3.17	N	11.65	gulf	Gulf NS + NB	NB	47.56	-64.89	5.78	21.50	0.00	0.34	9.35	19.00	0.00	0.27	49.17	100.00	0.00	0.16	0.00	1.00	0.00	0.00	0.00	20.00	0.00	0.00	1.08	5.40	0.00	0.04	0.00
