# Supplementary material for: Incorporating anthropogenic thresholds to improve understanding of cumulative effects on seagrass beds
Source: Atypon-hosted journal article supplement (doi:10.1139/facets-2021-0130), 2022-01-01
Supplement: facets-2021-0130_supplement3.csv [file facets-2021-0130_supplement3.csv]

bay	meadow.ID	CE.score.total.n	CE.threshold.score.total.n	CE.score.above.threshold.total.n	Nitrate_N_Coffin2021	nitrate.n.normalized	n.loading.impact.weight	nitrate.n.IS	nitrate.n.threshold	nitrate.n.normalized.threshold	nitrate.n.IS.threshold	urban.cover.IS	agri.cover.IS	invasion.extent.IS	shellfish.aquaculture.IS	hardened.shoreline.IS	urban.cover.IS.threshold	agri.cover.IS.threshold	invasion.extent.IS.threshold	shellfish.aquaculture.IS.threshold	hardened.shoreline.IS.threshold	CE.score.nitrate.n	CE.threshold.score.nitrate.n	CE.score.above.threshold.nitrate.n
Bouctouche	bouctouche.D	0.909	3.172	N	4.61	0.043	2.3	0.100	57	0.536	1.232	0.359	0.299	0.000	0.000	0.093	1.247	0.549	0.473	0.364	0.219	0.85	4.08	N
Bouctouche	bouctouche.C	1.489	3.172	N	4.61	0.043	2.3	0.100	57	0.536	1.232	0.359	0.299	0.000	0.000	0.673	1.247	0.549	0.473	0.364	0.219	1.43	4.08	N
Bouctouche	bouctouche.B	2.221	3.172	N	4.61	0.043	2.3	0.100	57	0.536	1.232	0.359	0.299	0.000	0.000	1.405	1.247	0.549	0.473	0.364	0.219	2.16	4.08	N
Bouctouche	bouctouche.A	4.371	3.172	Y	4.61	0.043	2.3	0.100	57	0.536	1.232	0.359	0.299	0.000	1.604	1.952	1.247	0.549	0.473	0.364	0.219	4.31	4.08	Y
Cocagne	cocagne.G	1.316	3.172	N	1.48	0.014	2.3	0.032	57	0.536	1.232	0.343	0.187	0.000	0.000	0.662	1.247	0.549	0.473	0.364	0.219	1.22	4.08	N
Cocagne	cocagne.F	1.787	3.172	N	1.48	0.014	2.3	0.032	57	0.536	1.232	0.343	0.187	0.000	0.000	1.132	1.247	0.549	0.473	0.364	0.219	1.69	4.08	N
Cocagne	cocagne.E	2.108	3.172	N	1.48	0.014	2.3	0.032	57	0.536	1.232	0.343	0.187	0.000	0.000	1.453	1.247	0.549	0.473	0.364	0.219	2.02	4.08	N
Cocagne	cocagne.H	3.200	3.172	Y	1.48	0.014	2.3	0.032	57	0.536	1.232	0.343	0.187	0.000	0.000	2.545	1.247	0.549	0.473	0.364	0.219	3.11	4.08	N
Cocagne	cocagne.A	2.911	3.172	N	1.48	0.014	2.3	0.032	57	0.536	1.232	0.343	0.187	0.000	0.000	2.256	1.247	0.549	0.473	0.364	0.219	2.82	4.08	N
Cocagne	cocagne.B	1.074	3.172	N	1.48	0.014	2.3	0.032	57	0.536	1.232	0.343	0.187	0.000	0.000	0.420	1.247	0.549	0.473	0.364	0.219	0.98	4.08	N
Cocagne	cocagne.D	1.238	3.172	N	1.48	0.014	2.3	0.032	57	0.536	1.232	0.343	0.187	0.000	0.000	0.584	1.247	0.549	0.473	0.364	0.219	1.15	4.08	N
Cocagne	cocagne.C	0.856	3.172	N	1.48	0.014	2.3	0.032	57	0.536	1.232	0.343	0.187	0.000	0.000	0.201	1.247	0.549	0.473	0.364	0.219	0.76	4.08	N
Covehead	covehead	3.447	3.255	Y	3.94	0.037	2.9	0.107	57	0.536	1.554	1.773	0.414	0.473	0.000	0.091	1.247	0.549	0.473	0.364	0.219	2.86	4.41	N
Kildare	kildare	4.681	3.255	Y	70.33	0.661	2.9	1.917	57	0.536	1.554	0.355	1.651	0.473	0.000	0.124	1.247	0.549	0.473	0.364	0.219	4.52	4.41	Y
Kouchibouguac	kouchibouguac.C	0.309	3.172	N	8.88	0.083	2.3	0.192	57	0.536	1.232	0.074	0.060	0.000	0.000	0.000	1.247	0.549	0.473	0.364	0.219	0.33	4.08	N
Kouchibouguac	kouchibouguac.J	0.309	3.172	N	8.88	0.083	2.3	0.192	57	0.536	1.232	0.074	0.060	0.000	0.000	0.000	1.247	0.549	0.473	0.364	0.219	0.33	4.08	N
Kouchibouguac	kouchibouguac.K	0.309	3.172	N	8.88	0.083	2.3	0.192	57	0.536	1.232	0.074	0.060	0.000	0.000	0.000	1.247	0.549	0.473	0.364	0.219	0.33	4.08	N
Kouchibouguac	kouchibouguac.A	0.309	3.172	N	8.88	0.083	2.3	0.192	57	0.536	1.232	0.074	0.060	0.000	0.000	0.000	1.247	0.549	0.473	0.364	0.219	0.33	4.08	N
Kouchibouguac	kouchibouguac.B	0.413	3.172	N	8.88	0.083	2.3	0.192	57	0.536	1.232	0.074	0.060	0.000	0.000	0.104	1.247	0.549	0.473	0.364	0.219	0.43	4.08	N
Kouchibouguac	kouchibougauc.I	0.613	3.172	N	8.88	0.083	2.3	0.192	57	0.536	1.232	0.074	0.060	0.000	0.000	0.304	1.247	0.549	0.473	0.364	0.219	0.63	4.08	N
Kouchibouguac	kouchibouguac.E	0.547	3.172	N	8.88	0.083	2.3	0.192	57	0.536	1.232	0.074	0.060	0.000	0.000	0.238	1.247	0.549	0.473	0.364	0.219	0.56	4.08	N
Kouchibouguac	kouchibouguac.L	0.309	3.172	N	8.88	0.083	2.3	0.192	57	0.536	1.232	0.074	0.060	0.000	0.000	0.000	1.247	0.549	0.473	0.364	0.219	0.33	4.08	N
Kouchibouguac	kouchibouguac.F	0.539	3.172	N	8.88	0.083	2.3	0.192	57	0.536	1.232	0.074	0.060	0.000	0.000	0.230	1.247	0.549	0.473	0.364	0.219	0.56	4.08	N
Kouchibouguac	kouchibouguac.D	0.630	3.172	N	8.88	0.083	2.3	0.192	57	0.536	1.232	0.074	0.060	0.000	0.000	0.321	1.247	0.549	0.473	0.364	0.219	0.65	4.08	N
Kouchibouguac	kouchibouguac.G	0.309	3.172	N	8.88	0.083	2.3	0.192	57	0.536	1.232	0.074	0.060	0.000	0.000	0.000	1.247	0.549	0.473	0.364	0.219	0.33	4.08	N
Kouchibouguac	kouchibouguac.H	0.309	3.172	N	8.88	0.083	2.3	0.192	57	0.536	1.232	0.074	0.060	0.000	0.000	0.000	1.247	0.549	0.473	0.364	0.219	0.33	4.08	N
Kouchibouguac	kouchibouguac.N	0.309	3.172	N	8.88	0.083	2.3	0.192	57	0.536	1.232	0.074	0.060	0.000	0.000	0.000	1.247	0.549	0.473	0.364	0.219	0.33	4.08	N
Kouchibouguac	kouchibouguac.O	0.309	3.172	N	8.88	0.083	2.3	0.192	57	0.536	1.232	0.074	0.060	0.000	0.000	0.000	1.247	0.549	0.473	0.364	0.219	0.33	4.08	N
Kouchibouguac	kouchibouguac.M	0.309	3.172	N	8.88	0.083	2.3	0.192	57	0.536	1.232	0.074	0.060	0.000	0.000	0.000	1.247	0.549	0.473	0.364	0.219	0.33	4.08	N
MillRiver	mill.river	4.363	3.255	Y	96.73	0.909	2.9	2.636	57	0.536	1.554	0.277	1.391	0.000	0.000	0.122	1.247	0.549	0.473	0.364	0.219	4.43	4.41	Y
Montague	montague.E	5.961	3.255	Y	76.91	0.723	2.9	2.096	57	0.536	1.554	0.408	1.002	1.418	0.000	0.496	1.247	0.549	0.473	0.364	0.219	5.42	4.41	Y
Montague	montague.F	5.750	3.255	Y	76.91	0.723	2.9	2.096	57	0.536	1.554	0.408	1.002	1.418	0.000	0.285	1.247	0.549	0.473	0.364	0.219	5.21	4.41	Y
Montague	montague.D	5.594	3.255	Y	76.91	0.723	2.9	2.096	57	0.536	1.554	0.408	1.002	1.418	0.000	0.129	1.247	0.549	0.473	0.364	0.219	5.05	4.41	Y
Montague	montague.C	5.615	3.255	Y	76.91	0.723	2.9	2.096	57	0.536	1.554	0.408	1.002	1.418	0.000	0.150	1.247	0.549	0.473	0.364	0.219	5.07	4.41	Y
Montague	montague.B	5.713	3.255	Y	76.91	0.723	2.9	2.096	57	0.536	1.554	0.408	1.002	1.418	0.000	0.248	1.247	0.549	0.473	0.364	0.219	5.17	4.41	Y
Montague	montague.A	5.755	3.255	Y	76.91	0.723	2.9	2.096	57	0.536	1.554	0.408	1.002	1.418	0.000	0.291	1.247	0.549	0.473	0.364	0.219	5.22	4.41	Y
Pictou	pictou.B	3.252	3.172	Y	0.48	0.005	2.3	0.010	57	0.536	1.232	0.544	0.228	0.000	0.000	2.140	1.247	0.549	0.473	0.364	0.219	2.92	4.08	N
Pictou	pictou.D	1.112	3.172	N	0.48	0.005	2.3	0.010	57	0.536	1.232	0.544	0.228	0.000	0.000	0.000	1.247	0.549	0.473	0.364	0.219	0.78	4.08	N
Pictou	pictou.A	3.067	3.172	N	0.48	0.005	2.3	0.010	57	0.536	1.232	0.544	0.228	0.000	0.000	1.955	1.247	0.549	0.473	0.364	0.219	2.74	4.08	N
Pictou	pictou.C	1.770	3.172	N	0.48	0.005	2.3	0.010	57	0.536	1.232	0.544	0.228	0.000	0.000	0.658	1.247	0.549	0.473	0.364	0.219	1.44	4.08	N
Pugwash	pugwash.D	1.628	3.172	N	0.29	0.003	2.3	0.006	57	0.536	1.232	0.196	0.357	0.000	0.000	0.895	1.247	0.549	0.473	0.364	0.219	1.45	4.08	N
Pugwash	pugwash.A	1.562	3.172	N	0.29	0.003	2.3	0.006	57	0.536	1.232	0.196	0.357	0.000	0.000	0.829	1.247	0.549	0.473	0.364	0.219	1.39	4.08	N
Pugwash	pugwash.B	1.572	3.172	N	0.29	0.003	2.3	0.006	57	0.536	1.232	0.196	0.357	0.000	0.000	0.839	1.247	0.549	0.473	0.364	0.219	1.40	4.08	N
Pugwash	pugwash.C	0.776	3.172	N	0.29	0.003	2.3	0.006	57	0.536	1.232	0.196	0.357	0.000	0.000	0.042	1.247	0.549	0.473	0.364	0.219	0.60	4.08	N
Souris	souris.C	4.914	3.255	Y	42.96	0.404	2.9	1.171	57	0.536	1.554	0.497	1.134	1.418	0.000	0.175	1.247	0.549	0.473	0.364	0.219	4.39	4.41	N
Souris	souris.B	4.951	3.255	Y	42.96	0.404	2.9	1.171	57	0.536	1.554	0.497	1.134	1.418	0.000	0.212	1.247	0.549	0.473	0.364	0.219	4.43	4.41	Y
Souris	souris.A	7.051	3.255	Y	42.96	0.404	2.9	1.171	57	0.536	1.554	0.497	1.134	1.418	1.818	0.493	1.247	0.549	0.473	0.364	0.219	6.53	4.41	Y
Southwest	southwest	4.334	3.255	Y	9.66	0.091	2.9	0.263	57	0.536	1.554	0.595	2.000	0.000	0.000	0.315	1.247	0.549	0.473	0.364	0.219	3.17	4.41	N
Stanley	stanley.trout.A	3.297	3.255	Y	67.88	0.638	2.9	1.850	57	0.536	1.554	0.520	1.412	0.473	0.000	0.127	1.247	0.549	0.473	0.364	0.219	4.38	4.41	N
Stanley	stanley.trout.E	3.683	3.255	Y	67.88	0.638	2.9	1.850	57	0.536	1.554	0.520	1.412	0.473	0.000	0.514	1.247	0.549	0.473	0.364	0.219	4.77	4.41	Y
Stanley	stanley.trout.B	3.296	3.255	Y	67.88	0.638	2.9	1.850	57	0.536	1.554	0.520	1.412	0.473	0.000	0.127	1.247	0.549	0.473	0.364	0.219	4.38	4.41	N
Stanley	stanley.trout.C	3.598	3.255	Y	67.88	0.638	2.9	1.850	57	0.536	1.554	0.520	1.412	0.473	0.000	0.429	1.247	0.549	0.473	0.364	0.219	4.68	4.41	Y
Stanley	stanley.trout.D	3.856	3.255	Y	67.88	0.638	2.9	1.850	57	0.536	1.554	0.520	1.412	0.473	0.001	0.686	1.247	0.549	0.473	0.364	0.219	4.94	4.41	Y
Tatamagouche	tatamagouche.B	0.877	3.172	N	21.67	0.204	2.3	0.468	57	0.536	1.232	0.155	0.383	0.000	0.000	0.228	1.247	0.549	0.473	0.364	0.219	1.23	4.08	N
Tatamagouche	tatamagouche.A	1.006	3.172	N	21.67	0.204	2.3	0.468	57	0.536	1.232	0.155	0.383	0.000	0.000	0.357	1.247	0.549	0.473	0.364	0.219	1.36	4.08	N
